# Supplementary material for: Energy transfer facilitated near infrared fluorescence imaging and photodynamic therapy of tumors
Source: Royal Society of Chemistry journal article supplement (doi:10.1039/d1bm00121c), 2021-01-01
Supplement: d1bm00121c1.pdf [file d1bm00121c1.pdf]

## **Supporting information**

### **Energy Transfer Facilitated Near Infrared Fluorescence Imaging and Photodynamic Therapy of Tumor**

Yanjing Wang,<sup>a,b</sup> Xiujuan Sun,<sup>a</sup> Yun Chang,<sup>a</sup> Haiyuan Zhang<sup>a, b \*</sup>

<sup>a</sup>Laboratory of Chemical Biology, Changchun Institute of Applied Chemistry, Chinese  
Academy of Sciences, Changchun 130022, (P. R. China);

<sup>b</sup>University of Science and Technology of China, Hefei, Anhui, 230026, (P. R. China).

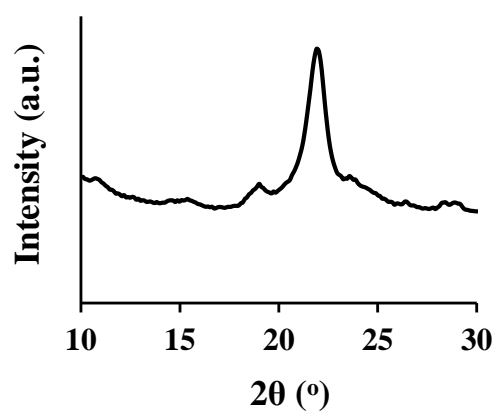

**Figure S1.** XRD pattern of N, S co-doped GQDs.

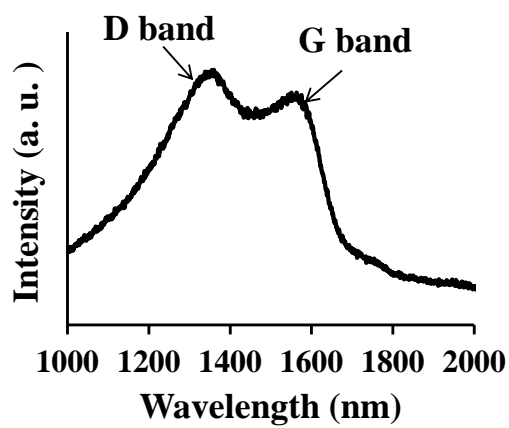

**Figure S2.** Raman spectrum of N, S co-doped GQDs GQDs.

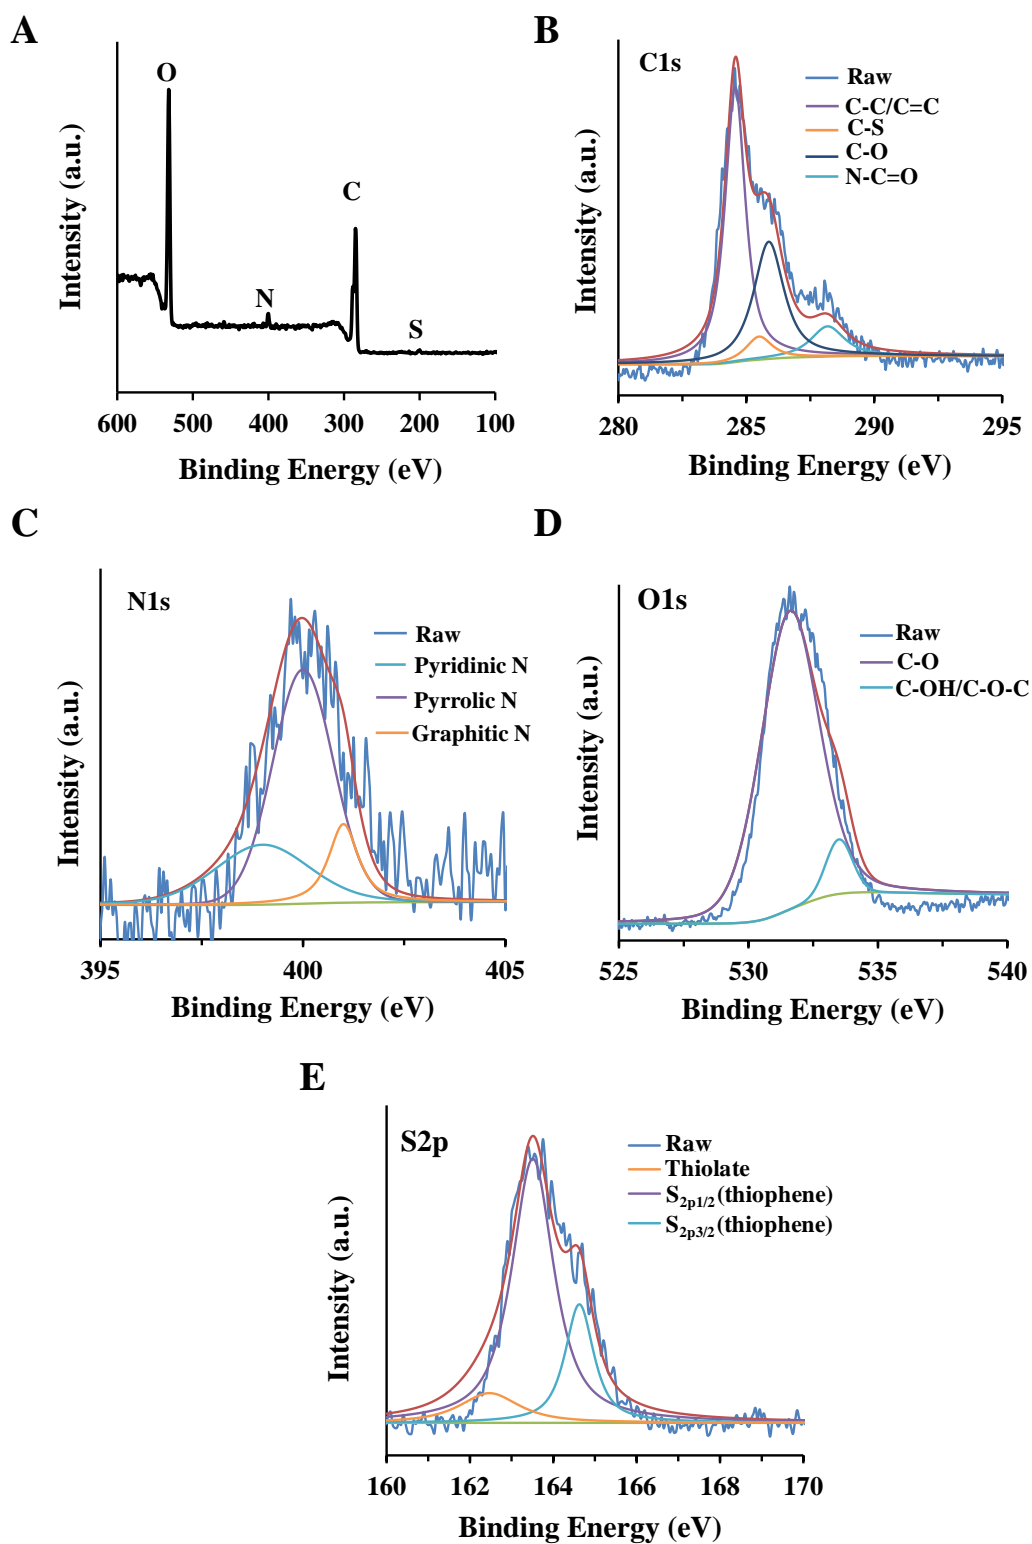

**Figure S3.** a) XPS survey spectrum and high-resolution spectra for (b) C 1s, (c) N 1s, (d) O 1s, and S 2p of N, S co-doped GQDs.

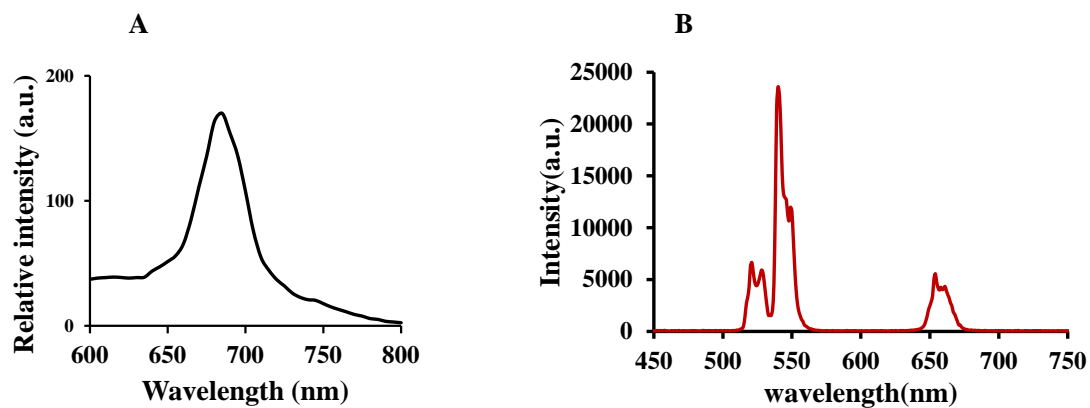

**Figure S4.** Fluorescence spectra of (a) N, S co-doped GQDs under 530 nm excitation and (b) GUCNPs under 980 nm excitation.

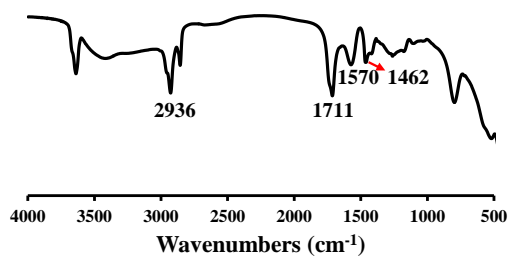

**Figure S5.** FT-IR spectra of P<sub>NS</sub>GQDs.

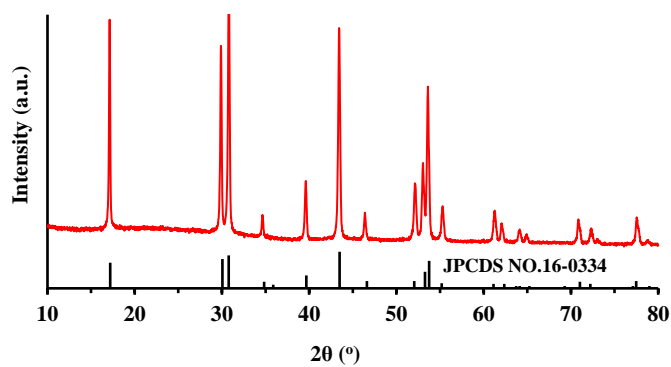

**Figure S6.** XRD patterns of UCNPs and JCPDS card.

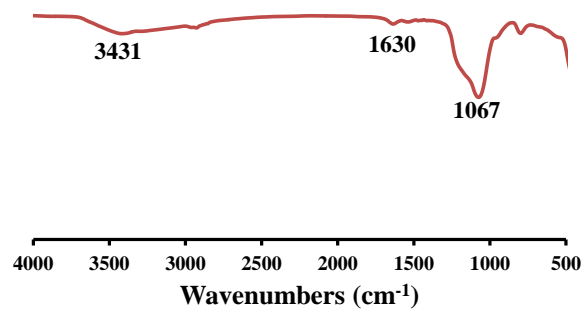

**Figure S7.** FT-IR spectra of  $_{AS}UCNPs$ .

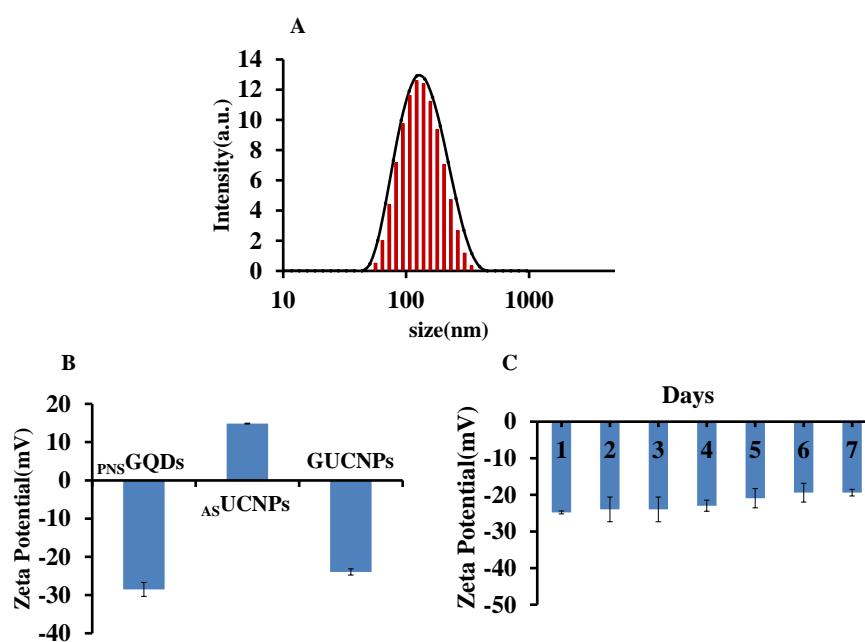

**Figure S8.** (a) Size distribution of GUCNPs by DLS; (b) Surface charge of the  $_{PNS}GQDs$ ,  $_{AS}UCNPs$  and GUCNPs; (c) Surface charge variation of GUCNPs within 7 days

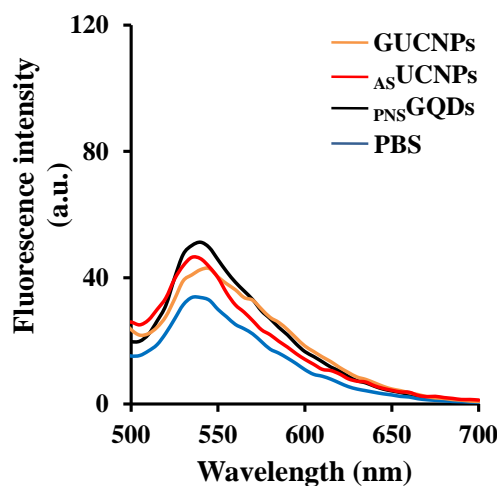

**Figure S9.**  $^1\text{O}_2$  generation on  $\text{PNSGQDs}$ ,  $\text{ASUCNPs}$ , and  $\text{GUCNPs}$  assessed by SOSG fluorescence emission without 980 nm laser irradiation.  $30 \mu\text{g mL}^{-1}$   $\text{PNSGQDs}$ ,  $170 \mu\text{g mL}^{-1}$   $\text{ASUCNPs}$ , or  $200 \mu\text{g mL}^{-1}$   $\text{GUCNPs}$  were incubated with  $12 \mu\text{mol L}^{-1}$  SOSG, and the fluorescence emission spectra of SOSG were recorded from 500 to 700 nm ( $\lambda_{\text{ex}} = 393 \text{ nm}$ ). The concentrations of  $\text{ASUCNPs}$  and  $\text{PNSGQDs}$  were equivalent to those in  $\text{GUCNPs}$ .

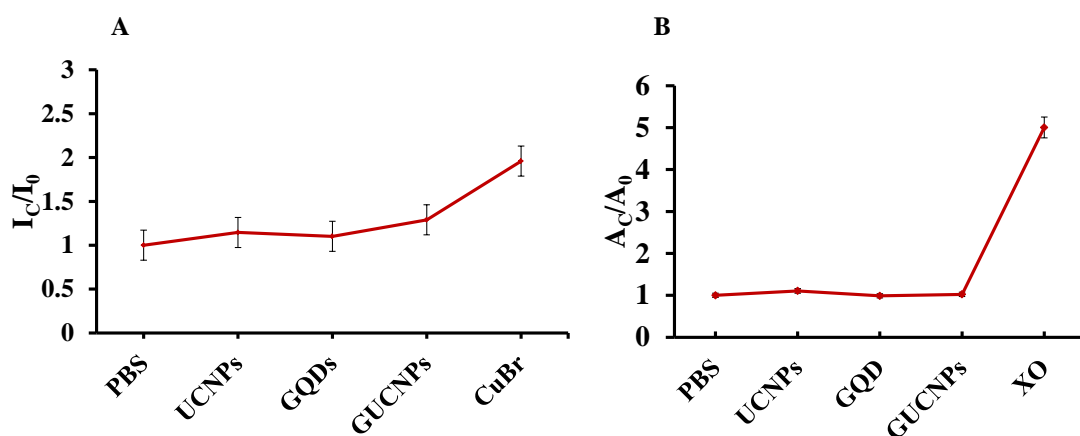

**Figure S10. The other types of ROS detection.**(a)TA detection assay for hydroxyl radical.  $20 \mu\text{L}$   $10 \mu\text{M}$  stock solution were added into  $100 \mu\text{L}$   $1 \text{ mg mL}^{-1}$   $\text{GUCNPs}$ ,  $\text{UCNPs}$ ,  $\text{GQDs}$  respectively. The TA fluorescence emission spectra were collected at 430 nm. (b) XTT detection assay for

superoxide radicals. 20  $\mu\text{L}$  100  $\mu\text{M}$  stock solution were added into 100  $\mu\text{L}$  1  $\text{mg mL}^{-1}$  GUCNPs, UCNPs, GQDs respectively. The absorbance of XTT was recorded at 460 nm.

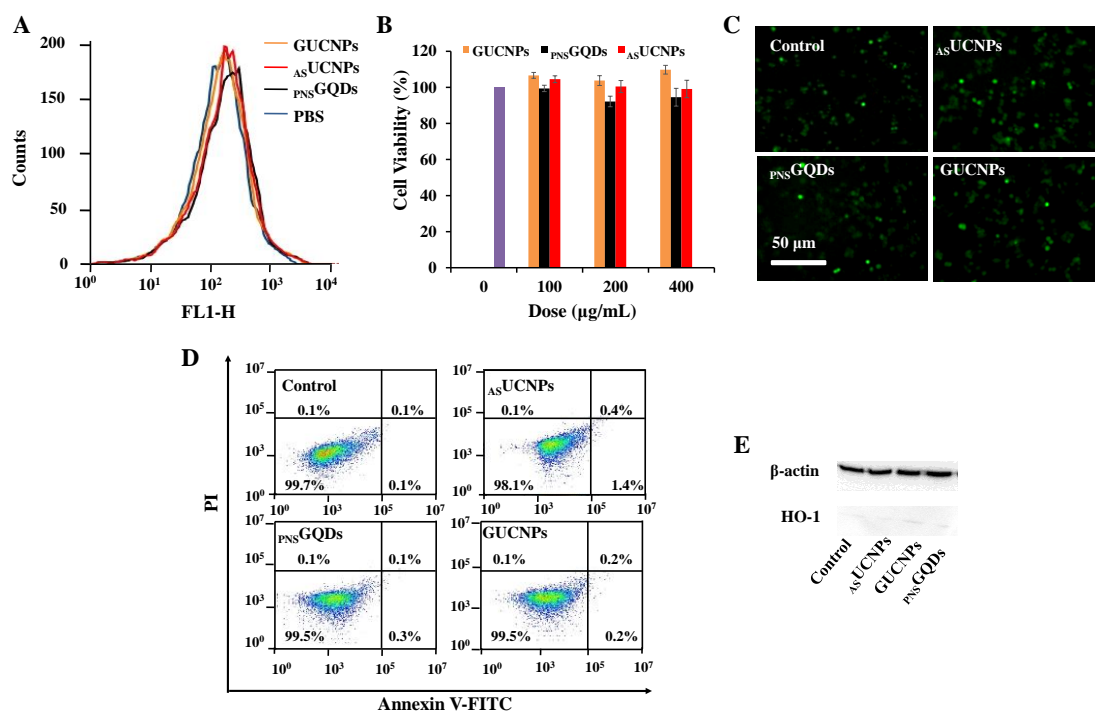

**Figure S11. Cellular responses of GUCNPs in 4T1 cells without 980 nm laser irradiation.** (a)

Cellular ROS production detected by flow cytometric analysis based on DCF assay; (b) Cell viability assessment by MTS assay; Cells were treated with various NPs for 24 h; (c) Live/Dead cell staining based on calcein AM/PI assay; (d) Apoptotic cells analyzed by flow cytometry based on Annexin V-FITC/PI staining; (e) HO-1 expression analyzed by western blot. For figures (a), and (c-e), cells were treated with 30  $\mu\text{g mL}^{-1}$  PNSGQDs, 170  $\mu\text{g mL}^{-1}$  ASUCNPs, or 200  $\mu\text{g mL}^{-1}$  GUCNPs for 24 h. For figure (b), cells were treated with 15-60  $\mu\text{g mL}^{-1}$  PNSGQDs, 85-340  $\mu\text{g mL}^{-1}$  ASUCNPs, or 100-400  $\mu\text{g mL}^{-1}$  GUCNPs for 24 h. The concentrations of ASUCNPs and PNSGQDs were equivalent to those in GUCNPs.

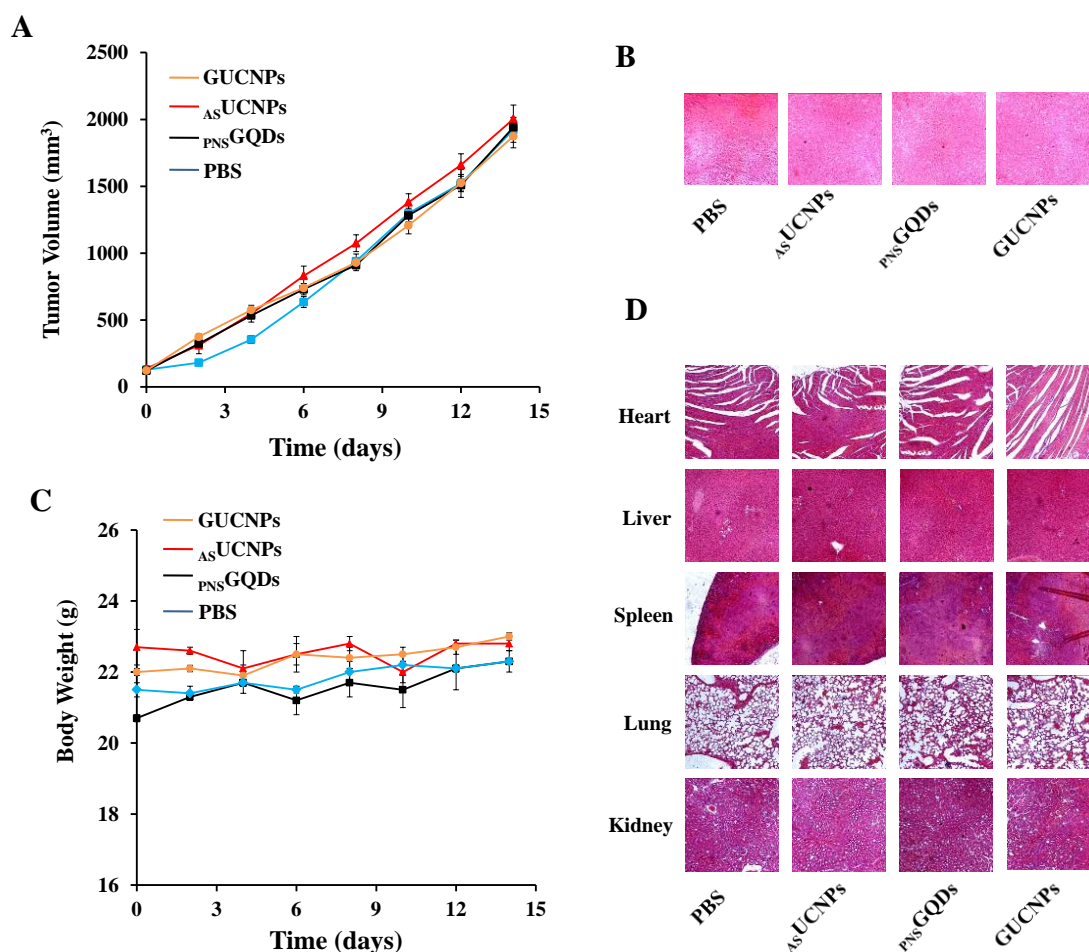

**Figure S12. The biosafety assessment of GUCNPs in 4T1 tumor bearing mice without 980 nm laser irradiation.** (a) Tumor growth curves of mice intravenously administered with PNSGQDs, ASUCNPs, or GUCNPs; (b) H&E stained histological images of the tumor tissues harvested from mice at the end of treatment; (c) Body weight variation of mice during the treatment period; (d) H&E stained histological images of major organs collected at the end of treatment.
